# Supplementary material
Source: PubMed Central journal article supplement (PMC3346362)

## Legends to supplemental figures

**FIG. S1.** Phylogenetic analysis of the two *Glomus intraradices* s. l. isolates based on exon sequences of the large subunit of mitochondrial ribosomal DNA (mtLSU). The majority rule consensus tree of 900 most parsimonious trees is presented. Bootstrap supports higher than 50 are indicated by numbers above the branches. Accession number and the respective isolate name are provided for all analysed sequences. The two isolates from the present study (Chomutov, PH5) are in blue, the mtLSU sequences of the isolates recognised as *G. irregulare* according to Stockinger et al. (36) are in red and those recognised as *G. intraradices* in green. Sequences of yet unclassified isolates are black and those belonging to other *Glomus* species are purple. The applicability of the mtLSU based qPCR assays for the analysed isolates is indicated: <sup>a</sup> Universal assay, <sup>b</sup> PH5 assay, <sup>c</sup> Chomutov assay. Note that mismatches in priming sites were recorded for some of the isolates other than Chomutov or PH5.

**FIG. S2.** Sequence alignment of the large subunit of nuclear ribosomal DNA of *G. intraradices* s. l. The sequences obtained from the cultures used as inocula in the present study are marked as 'PH5' and 'Chomutov'. Each ribotype is represented by one sequence. All other sequences were retrieved from GenBank.

**FIG. S3.** Schematic representation of the positions of the mtLSU primers used in this study. The structure of the mtLSU region as amplified by the primers RNL29 (Börstler et al. 2008) and GI<sub>mt</sub>4510R is depicted for the two studied isolates of *G. intraradices* s. l. (PH5 – isolate PH5; CH – isolate Chomutov). Insertions specific to only one of the two isolates are marked by dashed lines. The positions of the qPCR assays are marked by black arrows, the newly developed amplification and sequencing primers by blue and red arrows, respectively.

FIG. S1

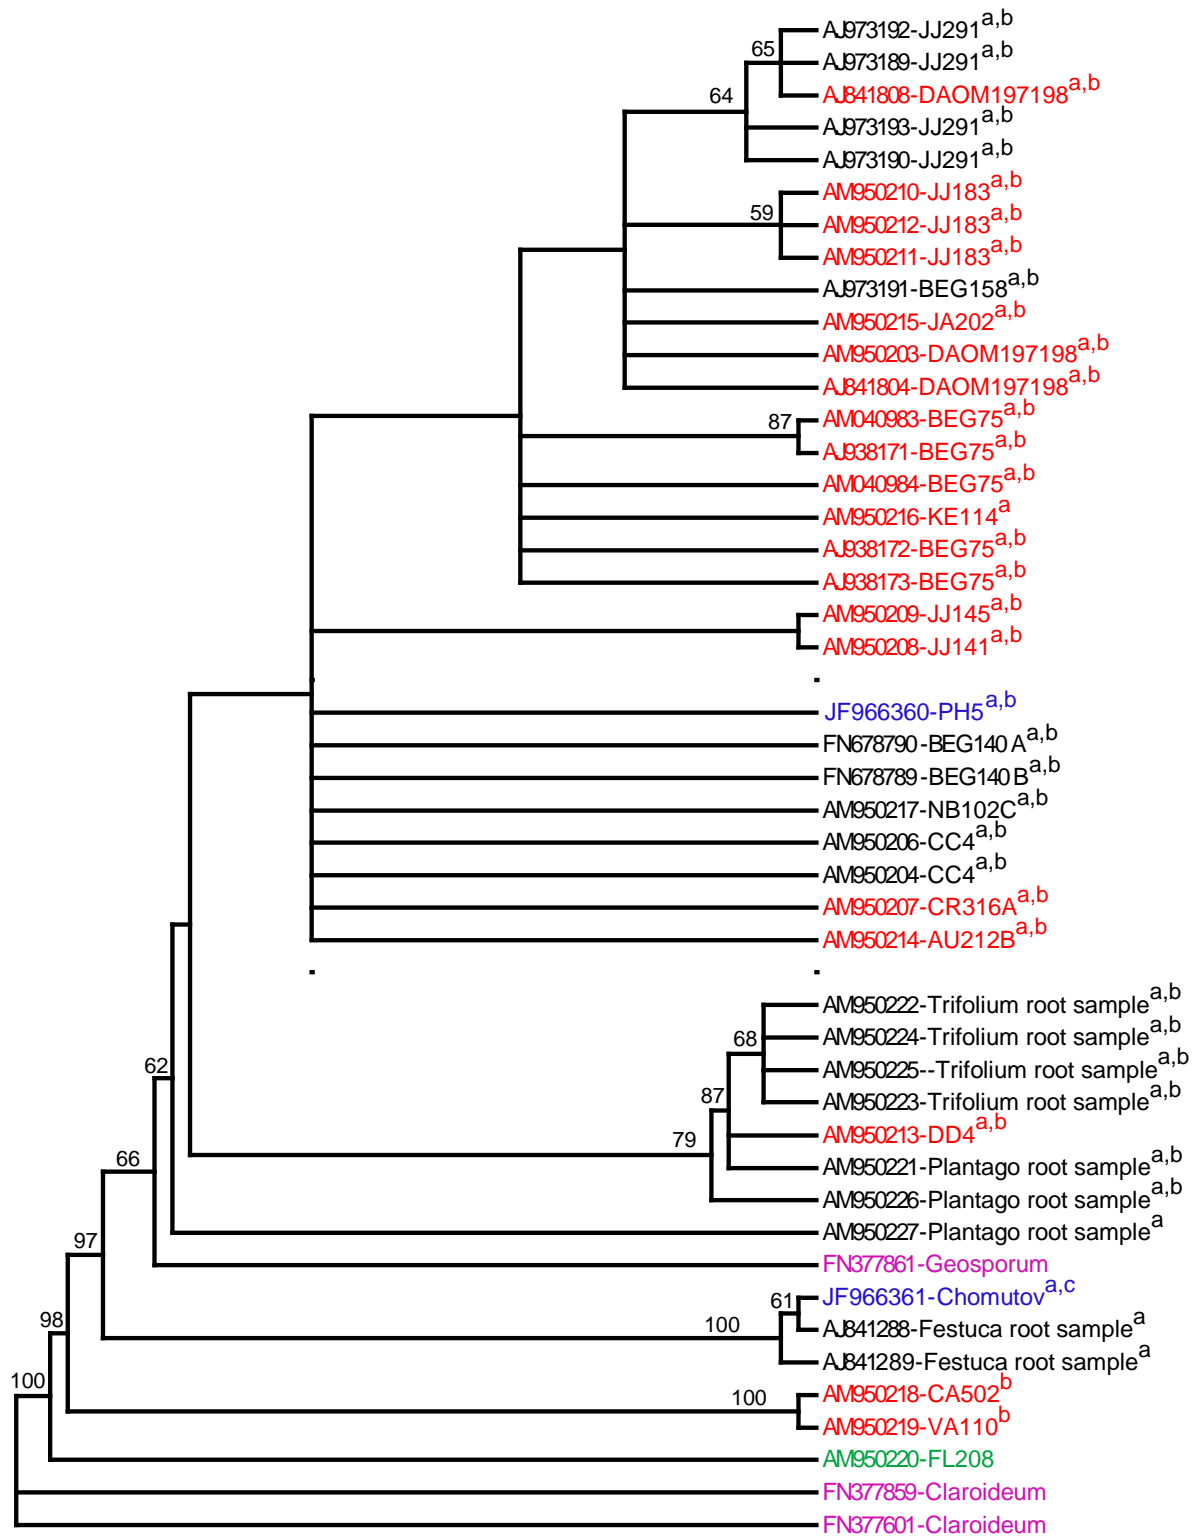

**FIG. S2**

|                      | 5          | 15         | 25         | 35          | 45         | 55         |
|----------------------|------------|------------|------------|-------------|------------|------------|
| Chomutov_15_JF966369 | GGCGAGAGAC | CGATAGCGAA | CAAGTACCGT | GAGGGAAAAGA | TGAAAAGAAC | TTTGAAAAGA |
| 25INTR gi 6169692    | GGCGAGAGAC | CGATAGCGAA | CAAGTACCGT | GAGGGAAAAGA | TGAAAAGAAC | TTTGAAAAGA |
| 23INTR gi 14669703   | ?????????? | ?????????? | ?????????? | ?????AAAGA  | TGAAAAGAAC | TTTGAAAAGA |
| 24INTR gi 61696928   | GGCGAGAGAC | CGATAGCGAA | CAAGTACCGT | GAGGGAAAAGA | TGAAAAGAAC | TTTGAAAAGA |
| 28INTR gi 61696924   | GGCGAGAGAC | CGATAGCGAA | CAAGTACCGT | GAGGGAAAAGA | TGAAAAGAAC | TTTGAAAAGA |
| 27INTR gi 159139348  | GGCGAGAGAC | CGATAGCGAA | CAAGTACCGT | GAGGGAAAAGA | TGAAAAGAAC | TTTGAAAAGA |
| 26INTR gi 159139353  | GGCGAGAGAC | CGATAGCGAA | CAAGTACCGT | GAGGGAAAAGA | TGAAAAGAAC | TTTGAAAAGA |
| PH5_7_JF966365       | GGCGAGAGAC | CGATAGCGAA | CAAGTACCGT | GAGGGAAAAGA | TGAAAAGAAC | TTTGAAAAGA |
| PH5_15_JF966362      | GGCGAGAGAC | CGATAGCGAA | CAAGTACCGT | GAGGGAA-GA  | TGAAAAG-AC | TTTGAAAAGA |
| PH5_19_JF966363      | GGCGAGAGAC | CGATAGCGAA | CAAGTACCGT | GAGGGAAAAGA | TGAAAAGAAC | TTTGAAAAGA |
| PH5_24_JF966364      | GGCGAGAGAC | CGATAGCGAA | CAAGTACCGT | GAGGGAAAAGA | TGAAAAGAAC | TTTGAAAAGA |
| 20INTR gi 61696929   | GGCGAGAGAC | CGATAGCGAA | CAAGTACCGT | GAGGGAAAAGA | TGAAAAGAAC | TTTGAAAAGA |
| 14INTR gi 184152616  | GGCGAGAGAC | CGATAGCGAA | CAAGTACCGT | GAGGGAAAAGA | TGAAAAGAAC | TTTGAAAAGA |
| 11INTR gi 62183614   | GGCGAGAGAC | CGATAGCGAA | CAAGTACCGT | GAGGGAAAAGA | TGAAAAGAAC | TTTGAAAAGA |
| 13INTR gi 62183610   | GGCGAGAGAC | CGATAGCGAA | CAAGTACCGT | GAGGGAAAAGA | TGAAAAGAAC | TTTGAAAAGA |
| 21INTR gi 18140768   | GGCGAGAGAC | CGATAGCGAA | CAAGTACCGT | GAGGGAAAAGA | TGAAAAGAAC | TTTGAAAAGA |
| 22INTR gi 82398570   | GGCGAGAGAC | CGATAGCGAA | CAAGTACCGT | GAGGGAAAAGA | TGAAAAGAAC | TTTGAAAAGA |
| 3INTR gi 56791312    | GGCGAGAGAC | CGATAGCGAA | CAAGTACCGT | GAGGGAAAAGA | TGAAAAGAAC | TTTGAAAAGA |
| 5INTR gi 18140788    | ?????????? | ?????????? | ?????????? | ??????????  | ?????????? | ?????????? |
| 19INTR gi 121488330  | GGCGAGAGAC | CGATAGCGAA | CAAGTACCGT | GAGGGAAAAGA | TGAAAAGAAC | TTTGAAAAGA |
| 1INTR gi 164612220   | GGCGAGAGAC | CGATAGCGAA | CAAGTACCGT | GAGGGAAAAGA | TGAAAAGAAC | TTTGAAAAGA |
| 2INTR gi 56791310    | GGCGAGAGAC | CGATAGCGAA | CAAGTACCGT | GAGGGAAAAGA | TGAAAAGAAC | TTTGAAAAGA |
| PH5_30_JF966366      | GGCGAGAGAC | CGATAGCGAA | CAAGTACCGT | GAGGGAAAAGA | TGAAAAGAAC | TTTGAAAAGA |
| Chomutov_27_JF966370 | GGCGAGAGAC | CGATAGCGAA | CAAGTACCGT | GAGGGAAAAGA | TGAAAAGAAC | TTTGAAAAGA |
| 15INTR gi 184152620  | GGCGAGAGAC | CGATAGCGAA | CAAGTACCGT | GAGGGAAAAGA | TGAAAAGAAC | TTTGAAAAGA |
| 10INTR gi 184152619  | GGCGAGAGAC | CGATAGCGAA | CAAGTACCGT | GAGGGAAAAGA | TGAAAAGAAC | TTTGAAAAGA |
| Chomutov_6_JF966367  | GGCGAGAGAC | CGATAGCGAA | CAAGTACCGT | GAGGGAAAAGA | TGAAAAGAAC | TTTGAAAAGA |
| Chomutov_12_JF966368 | GACGAGAGAC | CGATAGCGAA | CAAGTACCGT | GAGGGAAAAGA | TGAAAAGAAC | TTTGAAAAGA |
| 18INTR gi 44889794   | ?????????? | ?????????? | ?????????? | ???GGAAAAGA | TGAAAAGAAC | TTTGAAAAGA |
| 8INTR gi 44889843    | ?????????? | ?????????? | ?????????? | ???GGAAAAGA | TGAAAAGAAC | TTTGAAAAGA |
| 24CLA gi 6966953     | GGCGAGAGAC | CGATAGCGAA | CAAGTACCGT | GAGGGAAAAGA | TGAAAAGAAC | TTTGAAAAGA |
| 4ETUN gi 44889774    | ?????????? | ?????????? | ?????????? | ???GGAAAAGA | TGAAAAGAAC | TTTGAAAAGA |
| 13MOS gi 49246000    | GGCGAGAGAC | CGATAGCGAA | CAAGTACCGT | GAGGGAAAAGA | TGAAAAGAAC | TTTGAAAAGA |
| 12GEO gi 197215938   | ?????????? | ?????????? | ?????????? | ???GGAAAAGA | TGAAAAGAAC | TTTGAAAAGA |
| 6MOS gi 49246116     | GGCGAGAGAC | CGATAGCAA  | CAAGTACCGT | GAGGGAAAAGA | TGAAAAGAAC | TTTGAAAAGA |

**FIG. S2**

|                      | 65         | 75         | 85         | 95         | 105        | 115        |
|----------------------|------------|------------|------------|------------|------------|------------|
| Chomutov_15_JF966369 | GAGTTAAACA | GTACGTGAAA | TT-GTTGAAA | GGGAAACGAT | TGAAGCCAGT | CGTACCGGCG |
| 25INTR gi 6169692    | GAGTTAAACA | GTACGTGAAA | TT-GTTGAAA | GGGAAACGAT | TGAAGCCAGT | CGTACCTTCG |
| 23INTR gi 14669703   | GAGTTAAACA | GTACGTGAAA | TT-GTTGAAA | GGGAAACGAT | TGAAGCCAGT | CGTACCTTCG |
| 24INTR gi 61696928   | GAGTTAAACA | GTACGTGAAA | TT-GTTGAAA | GGGAAACGAT | TGAAGCCAGT | CGTACCTTCG |
| 28INTR gi 61696924   | GAGTTAAACA | GTACGTGAAA | TT-GTTGAAA | GGGAAACGAT | TGAAGCCAGT | CGTACCTTCG |
| 27INTR gi 159139348  | GAGTTAAACA | GTACGTGAAA | TT-GTTGAAA | GGGAAACGAT | TGAAGCCAGT | CGTACCTTCG |
| 26INTR gi 159139353  | GAGTTAAACA | GTACGTGAAA | TT-GTTGAAA | GGGAAACGAT | TGAAGCCAGT | CGTACCTTCG |
| PH5_7_JF966365       | GAGTTAAACA | GTACGTGAAA | TT-GTTGAAA | GGGAAACGAT | TGAAGCCAGT | CGTACCTTCG |
| PH5_15_JF966362      | GWGTTAAACA | GTACGTGAAA | TY-GTTGAAA | GGGAAACGAT | YGAAGCCAGT | CGTACCTTCG |
| PH5_19_JF966363      | GAGTTAAACA | GTACGTGAAA | TT-GTTGAAA | GGGAAACGAT | TGAAGCCAGT | CGTACCTTCG |
| PH5_24_JF966364      | GAGTTAAACA | GTACGTGAAA | TT-GTTGAAA | GGGAAACGAT | TGAAGCCAGT | CGTACCTTCG |
| 20INTR gi 61696929   | GAGTTAAACA | GTACGTGAAA | TT-GTTGAAA | GGGAAACGAT | TGAAGCCAGT | CGTACCTTCG |
| 14INTR gi 184152616  | GAGTTAAACA | GTACGTGAAA | TT-GTTGAAA | GGGAAACGAT | TGAAGCCAGT | CGTACCTTCG |
| 11INTR gi 62183614   | GAGTTAAACA | GTACGTGAAA | TT-GTTGAAA | GGGAAACGAT | TGAAGCCAGT | CGTACCTTCG |
| 13INTR gi 62183610   | GAGTTAAACA | GTACGTGAAA | TT-GTTGAAA | GGGAAACGAT | TGAAGCCAGT | CGTACCTTCG |
| 21INTR gi 18140768   | GAGTTAAACA | GTACGTGAAA | TT-GTTGAAA | GGGAAACGAT | TGAAGCCAGT | CGTACCTTCG |
| 22INTR gi 82398570   | GAGTTAAACA | GTACGTGAAA | TT-GTTGAAA | GGGAAACGAT | TGAAGCCAGT | CGTACCTTCG |
| 3INTR gi 56791312    | GAGTTAAATA | GTACGTGAAA | TT-GTTGAAA | GGGAAACGAT | TGAAGCCAGT | CGTACCTTCG |
| 5INTR gi 18140788    | ?????????? | ?????????? | ??-??????? | ?????????? | ?????????? | ?????????? |
| 19INTR gi 121488330  | GAGTTAAACA | GTACGTGAAA | TT-GTTGAAA | GGGAAACGAT | TGAAGCCAGT | CGTACCTTCG |
| 1INTR gi 164612220   | GAGTTAAACA | GTACGTGAAA | TT-GTTGAAA | GGGAAACGAT | TGAAGCCAGT | CGTACCTTCG |
| 2INTR gi 56791310    | GAGTTAAACA | GTACGTGAAA | TT-GTTGAAA | GGGAAACGAT | TGAAGCCAGT | CGTACCTTCG |
| PH5_30_JF966366      | GAGTTAAACA | GTACGTGAAA | TT-GTTGAAA | GGGAAACGAT | TGAAGCCAGT | CGTACCTTCG |
| Chomutov_27_JF966370 | GAGTTAAATA | GTACGTGAAA | TT-GTTGAAA | GGGAAACGAT | TGAAGTCAGT | CGTACCTGCG |
| 15INTR gi 184152620  | GAGTTAAATA | GTACGTGAAA | TT-GTTGAAA | GGGAAACGAT | TGAAGTCAGT | CGTACCTGCG |
| 10INTR gi 184152619  | GAGTTAAATA | GTACGTGAAA | TT-GTTGAAA | GGGAAACGAT | TGAAGCCAGT | CGTACCTGCG |
| Chomutov_6_JF966367  | GAGTTAAATA | GTACGTGAAA | TT-GTTGAAA | GGGAAACGAT | TGAAGCCAGT | CGTACCTGCG |
| Chomutov_12_JF966368 | GAGTTAAATA | GTACGTGAAA | TT-GTTGAAA | GGGAAACGAT | TGAAGCCAGT | CGTACCTGCG |
| 18INTR gi 44889794   | GAGTTAAACA | GTACGTGAAA | TT-GTTGAAA | GGGAAACGAT | TGAAGCCAGT | CGTACCGGCG |
| 8INTR gi 44889843    | GAGTTAAACA | GTACGTGAAA | TT-GTTGAAA | GGGAAACGAT | TGAAGCCAGT | CGTACCGGCG |
| 24CLA gi 6966953     | GAGTTAAACA | GTACGTGAAA | TT-GTTGAAA | GGGAAACGAT | TGAAGTCAGT | CGTGCTGGCG |
| 4ETUN gi 44889774    | GAGTTAAACA | GTACGTGAAA | TT-GTTGAAA | GGGAAACGAT | TGAAGTCAGT | CGTGCTGGCG |
| 13MOS gi 49246000    | GAGTTAAACA | GTACGTGAAA | TT-GTTGAAA | GGGAAACGAT | TGAAGTCAGT | CATACCAACG |
| 12GEO gi 197215938   | GAGTTAAACA | GTACGTGAAA | TT-GTTGAAA | GGGAAACGAT | TGAAGTCAGT | CATACCAACG |
| 6MOS gi 49246116     | GAGTTAAATA | GTACGTGAAA | TT-GTTGGAA | AGGAAACGAT | TAAAGTCAGT | CATATCAACG |

**FIG. S2**

|                      | ..... ..... | ..... ..... | ..... ..... | ..... ..... | ..... ..... | ..... ..... |
|----------------------|-------------|-------------|-------------|-------------|-------------|-------------|
|                      | 125         | 135         | 145         | 155         | 165         | 175         |
| Chomutov_15_JF966369 | GGTAATCAGC  | CTTTTCGGGTA | TGATTCTGTG  | GAGCGTGAGG  | AG-TTAAACG  | CCTTCATGCC  |
| 25INTR gi 6169692    | GGTAATCAGC  | CTTTTCGGGTG | CGATTCTGTG  | GAGTGTGATG  | AGCTT-AACA  | CCTTCATGCT  |
| 23INTR gi 14669703   | GGTAATCAGC  | CTTTTCGGGTG | CGATTCTGTG  | GAGTGTGATG  | AGCTT-AACA  | CCTTCATGCT  |
| 24INTR gi 61696928   | GGTAATCAGC  | CTTTTCGGGTG | CGATTCTGTG  | GAGTGTGATG  | AGCTT-AACA  | CCTTCATGCT  |
| 28INTR gi 61696924   | GGTAATCAGC  | CTTTTCGGGTG | CAATTCTGTG  | GAGTGTGAGG  | AGCTT-AACA  | CCTTCATGCT  |
| 27INTR gi 159139348  | GGTAATCAGC  | CTTTTCGGGTG | CGATTCTGTG  | GAGTGTGAGG  | AGCTT-AACA  | CCTTCATGCT  |
| 26INTR gi 159139353  | GGTAATCAGC  | CTTTTCGGGTG | CGATTCTGTG  | GAGTGTGAGG  | AGCTT-AACA  | CCTTCATGCT  |
| PH5_7_JF966365       | GGTAATCAGC  | CTTTTCGGGTG | CGATTCTGTG  | GAGTGTGAGG  | AGCTT-AACA  | CCTTCATGCT  |
| PH5_15_JF966362      | GGTAATCAGC  | CTTTTCGGGTG | CGATTCTGTG  | GAGTGTGAGG  | AGCTT-AACA  | CCTTCATGCT  |
| PH5_19_JF966363      | GGTAATCAGC  | CTTTTCGGGTG | CGATTCTGTG  | GAGTGTGAGG  | AGCTT-AACA  | CCTTCATGCT  |
| PH5_24_JF966364      | GGTAATCAGC  | CTTTTCGGGTG | CGATTCTGTG  | GAGTGTGAGG  | AGCTT-AACA  | CCTTCATGCT  |
| 20INTR gi 61696929   | GGTAATCAGC  | CTTTTCGGGTG | CGATTCTGTG  | GGGTGTGAGG  | AGCTT-AACA  | CCTTCATGCT  |
| 14INTR gi 184152616  | GGTAATCAGC  | CTTTTCGGGTG | CGATTCTGTG  | GAGTGTGAGG  | AGCTTAAACA  | CCTTCATGTT  |
| 11INTR gi 62183614   | GGTAATCAGC  | CTTTTCGGGTG | CGATTATGTG  | GAGTGTGAGG  | AGCTTAAACA  | CCTTCATGTT  |
| 13INTR gi 62183610   | GGTAATCAGC  | CTTTTCGGGTG | CGATTATGTG  | GAGTGTGAGG  | AGCTTAAACA  | CCTTCATGTT  |
| 21INTR gi 18140768   | GGTAATCAGC  | CTTTTCGGGTG | CGATTCTGTG  | GAGTGTGAGG  | AG-TTAAACA  | CCTTCATGTT  |
| 22INTR gi 82398570   | GGTAATCAGC  | CTTTTCGGGTG | CGATTCTGTG  | GAGTGTGAGG  | AGCTTAAACA  | CCTTCATGTT  |
| 3INTR gi 56791312    | GGTAATCAGC  | CTTTTCGGGTG | CGATTCTGTG  | GAGTGTGAGG  | AGCTTAAACA  | CCTTCATGTT  |
| 5INTR gi 18140788    | ??????????  | ??????????G | CGATTCTGTG  | GAGTGT-AGG  | AGCTTTAACA  | CCTTCATGCT  |
| 19INTR gi 121488330  | GGTAATCAGC  | CTTTTCGGGTG | CGATTCTGTG  | GAGTTTGAGG  | AGCTTTAACA  | CCTTCATGCT  |
| 1INTR gi 164612220   | GGTAATCAGC  | CTTTTGGGTG  | TGATTCTGTG  | GAGCGTGAGG  | AGTTTTAACA  | CCTTCATGCT  |
| 2INTR gi 56791310    | GGTAATCAGC  | CTTTTGGGTG  | TGATTTTGTG  | GAGCGTGAAG  | AG-TTAAACG  | CCTTCATGCT  |
| PH5_30_JF966366      | GGTAATCAGC  | CTTTTGGGTG  | TGATTTTGTG  | GAGTGTGAAG  | AG-TTAAACG  | CCTTCATGCC  |
| Chomutov_27_JF966370 | GATAATCAGC  | CTTTTAGGATG | CGATTTTGTG  | GAGTGTGAGG  | AGCT-AATCG  | CCTTCATGCC  |
| 15INTR gi 184152620  | GATAATCAGC  | CTTTTAGGATG | CGATTTTGTG  | GAGTGTGAGG  | AGCT-AATCG  | CCTTCATGCC  |
| 10INTR gi 184152619  | GGTAATCAGC  | CTTTTGGGCA  | TGATTCTGTG  | GAGCGTGAGG  | AG-TTAAACG  | CCTTCATGCC  |
| Chomutov_6_JF966367  | GGTAATCAGC  | CTTTTGGGCA  | TGATTCTGTG  | GAGCGTGAGG  | AG-TTAAACG  | CCTTCATGCC  |
| Chomutov_12_JF966368 | GGTAATCAGC  | CTTTTGGGCA  | TGATTCTGTG  | GAGCGTGAGG  | AG-TTAAACG  | CCTTCATGCC  |
| 18INTR gi 44889794   | GGTAATCAGC  | CTTTTCGGGTA | TGATTCTGTG  | GAGCGTGAGG  | AG-TTAAACG  | CCTTCATGCC  |
| 8INTR gi 44889843    | GGTAATCAGC  | CTTTTGGAGCG | TGATTATGTG  | GAGCGTGAGG  | AG-TTAAACG  | CCTTCATGCC  |
| 24CLA gi 6966953     | CGAAATCAAC  | CCTCTCGTCG  | AGAGGACACA  | TGGCGTGGCG  | AGCCTCAAAA  | CCGTCACGAA  |
| 4ETUN gi 44889774    | CGAAATCAAC  | CATCTCGTCT  | TGAGGTCGCA  | TGGCGCGACG  | AGCCTCAAAA  | CCGTCACGAA  |
| 13MOS gi 49246000    | GGAAATCAAC  | CTTTTCGAGCT | TGGTCTCGTG  | GGTTTTGAAG  | AGTTTCAAAG  | CCTTC-GGAT  |
| 12GEO gi 197215938   | GGAAATCAAC  | CTTTTGGAGTT | CGTTCCTTGTG | GGTTTCGAGG  | AGTTTAAAAG  | CCTTC-TAAT  |
| 6MOS gi 49246116     | GGAAATCAAC  | CTTTTGGAGTT | CGGTCTTGTG  | GGTTT-GAAG  | AGTTTCAAAG  | CCTTC-GGAT  |

FIG. S2

|                      | ..... ..... | ..... ..... | ..... ..... | ..... ..... | ..... ..... | ..... ..... |
|----------------------|-------------|-------------|-------------|-------------|-------------|-------------|
|                      | 185         | 195         | 205         | 215         | 225         | 235         |
| Chomutov_15_JF966369 | C-GCAT---A  | TTTCGTGCTCT | T-GGGTGTAC  | TTGCTCGTGT  | GGTTGGTTAA  | CATCAATTTT  |
| 25INTR gi 6169692    | TTGCAT---A  | TTTGTGCTCT  | T-GGGTGTAC  | TTGCCCGTGT  | GGTTGGTTAA  | CATCAATTTT  |
| 23INTR gi 14669703   | TTGCAT---A  | TTTGTGCTCT  | T-GGGTGTAC  | TTGCCCGTGT  | GGTTGGTTAA  | CATCAATTTT  |
| 24INTR gi 61696928   | TTGCAT---A  | TTTGTGCTCT  | T-GGGTGTAC  | TTGCCCGTGT  | GGTAGGTTAA  | CATCAATTTT  |
| 28INTR gi 61696924   | TTGCAT---A  | TTTGTGCTCT  | T-GGGTGTAC  | TTGCCCGTGT  | GGTTGGTTAA  | CATCAATTTT  |
| 27INTR gi 159139348  | TTGCAT---A  | TTTGTGCTCT  | T-GGGTGTAC  | TTGCCCGTGT  | GGTTGGTTAA  | CATCAATTTT  |
| 26INTR gi 159139353  | TTGCAT---A  | TTTGTGCTCT  | T-GGGTGTAC  | TTGCCCGTGT  | GGTTGGTTAA  | CATCAATTTT  |
| PH5_7_JF966365       | TTGCAT---A  | TTTGTGCTCT  | T-GGGTGTAC  | TTGCTCGTGT  | GGTTGGTTAA  | CATCAATTTT  |
| PH5_15_JF966362      | TTGCAT---A  | TTYGTGCTCT  | C-GGGTGTAC  | TTGCCCGTGT  | GGTTGGTTAA  | CATCAATTTT  |
| PH5_19_JF966363      | TTGCAT---A  | TTTGTGCTCT  | T-GGGTGTAC  | TTGCCCGTGT  | GGTTGGTTAA  | CATCAATTTT  |
| PH5_24_JF966364      | TTGCAT---A  | TTTGTGCTCT  | T-GGGTGTAC  | TTGCCCGTGT  | GGTTGGTTAA  | CATCAATTTT  |
| 20INTR gi 61696929   | TTGCAT---A  | TTTGTGCTCT  | T-GGGTGTAC  | TTGCCCGTGT  | GGTTGGTTAA  | CATCAATTTT  |
| 14INTR gi 184152616  | TTGCAT---A  | TTTCGTACTCT | T-GGGTGTAC  | TTGCCCGTGT  | GGTTGGTTAA  | CATCAATTTT  |
| 11INTR gi 62183614   | TTGCAT---A  | TTTCGTACTCT | T-GGGTGTAC  | TTGCCCGTGT  | GGTTGGTTAA  | CATCAATTTT  |
| 13INTR gi 62183610   | TTGCAT---A  | TTTCGTACTCT | T-GGGTGTAC  | TTGCCCGTAT  | GGTTGGTTAA  | CATCAATTTT  |
| 21INTR gi 18140768   | TTGCAT---A  | TTTCGTACTCT | T-GGGTGTAC  | TTGCCCGTGT  | GGTTGGTTAA  | CATCAATTTT  |
| 22INTR gi 82398570   | TTGCAT---A  | TTTCGTACTCT | T-GGGTGTAC  | TTGCCCGTGT  | GGTTGGTTAA  | CATCAATTTT  |
| 3INTR gi 56791312    | TTGCAT---A  | TTTCGTACTCT | T-GGGTGTAC  | TTGCCCGTGT  | GGTTGGTTAA  | CATCAATTTT  |
| 5INTR gi 18140788    | TTGCAT---A  | TTTCGTGCTCT | T-GGGTGTAC  | TTGCCCGTGT  | GGTTGGTTAA  | CATCAATTTT  |
| 19INTR gi 121488330  | TTGCAT---A  | TTTCGTGCTCT | T-GGGTGTAC  | TTGCCCGTGT  | GGTTGGTTAA  | CATCAATTTT  |
| 1INTR gi 164612220   | TTGCAT---A  | TTTCGTGCTCT | T-GGGTGTAC  | TTGCCCGTGT  | GGTTGGTTAA  | CATCAATTTT  |
| 2INTR gi 56791310    | T-GCAT---A  | TTTCGTGCACT | TTGGGTGTAC  | TTGCCCGTGT  | GGTTGGTTAA  | CATCAATTTT  |
| PH5_30_JF966366      | T-GCAT---A  | TTTCGTGCACT | TTGGGTGTAC  | TTGCCCGTGT  | GGTTGGTTAA  | CATCAATTTT  |
| Chomutov_27_JF966370 | T-GTAT---A  | TTTCGTGTACT | TGGGGTGTAC  | TTATTCGTGT  | GGTAAGTTAA  | CATCAATTTT  |
| 15INTR gi 184152620  | T-GTAT---A  | TTTCGTGTACT | TGGGGTGTAC  | TTATTCGTGT  | GGTAAGTTAA  | CATCAATTTT  |
| 10INTR gi 184152619  | T-GCAT---A  | TTTCGTGTACT | TTGGGTGTAC  | TTGCCTGTGT  | GGTTAGTTAA  | CATCAATTTT  |
| Chomutov_6_JF966367  | T-GCAT---A  | TTTCGTGTACT | TTGGGTGTAC  | TTGCCTGTGT  | GGTTAGTTAA  | CATCAATTTT  |
| Chomutov_12_JF966368 | T-GCAT---A  | TTTCGTGTACT | TTGGGTGTAC  | TTGCCTGTGT  | GGTTAGTTAA  | CATCAATTTT  |
| 18INTR gi 44889794   | T-GCAT---A  | TTTCGTGCTCT | T-GGGTGTAC  | TTGCTCGTGT  | GGTTGGTTAA  | CATCAATTTT  |
| 8INTR gi 44889843    | T-TCAT---A  | TTTCGTGCTCT | TTGGGTGTAC  | TTGCTCGTGT  | GGTAGGTTAA  | CATCAATTTT  |
| 24CLA gi 6966953     | GCGTG---AA  | CTCTTGCCGA  | AAAGGAGCAC  | TTTCGTGTCC  | G-CTGGTTAA  | CATCAATTTT  |
| 4ETUN gi 44889774    | GCGTG---AA  | CTCTTGACGA  | AAAGGTGCAC  | TTTCGTGTCC  | G-CTGGTTAA  | CATCAATTTT  |
| 13MOS gi 49246000    | TCGCGGG---A | TT-GGGATCT  | CTTGGTGTAC  | TTTTTTCGTAC | GGTTAGTCAA  | CATCGGTTTT  |
| 12GEO gi 197215938   | TTGTGAGG-A  | TT-GGGCTCT  | TTTGGTGTAC  | TTTTTTCGTAC | GGTTAGTCAA  | CATCGGTTTT  |
| 6MOS gi 49246116     | TTGTGAG--A  | TT-GGGATCT  | CTTGGTGCAC  | TTTTTTCGTAC | GGTTAGTCAA  | CATCGGTTTT  |

**FIG. S2**

|                      | ..... ..... | ..... ..... | ..... ..... | ..... ..... | ..... ..... | ..... ..... |
|----------------------|-------------|-------------|-------------|-------------|-------------|-------------|
|                      | 245         | 255         | 265         | 275         | 285         | 295         |
| Chomutov_15_JF966369 | GGTTATCATA  | AAATGGCTGG  | AGGAATGTAG  | CTTCGATTTTC | G-ATCGAAGT  | GTT-ATAGCC  |
| 25INTR gi 6169692    | GGTTATCATA  | AAATGATTGG  | AGGAATGTAG  | CTTCGATCTC  | GTATTGAAGT  | GTT-ATAGCC  |
| 23INTR gi 14669703   | GGTTATCATA  | AAATGACTGG  | AGGAATGTAG  | CTTCGATCTC  | GTATTGAAGT  | GTTTATAGCC  |
| 24INTR gi 61696928   | GGTTATCATA  | AAATGATTGG  | AGGAATGTAG  | CTTCGATCTC  | GTATTGAAGT  | GTT-ATAGCC  |
| 28INTR gi 61696924   | GGTTATCATA  | AAATGATTGG  | AGGAATGTAG  | CTTCGATCTC  | GTATTGAAGT  | GTT-ATAGCC  |
| 27INTR gi 159139348  | GGTTATCATA  | AAATGATTGG  | AGGAATGTAG  | CTTCGATCTC  | GTATTGAAGT  | GTT-ATAGCC  |
| 26INTR gi 159139353  | GGTTATCATA  | AAATGATTGG  | AGGAATGTAG  | CTTCGATCTC  | GTATTGAAGT  | GTT-ATAGCC  |
| PH5_7_JF966365       | GATTATCATA  | AAATGATTGG  | AGGAATGTAG  | CTTCGATCTC  | GTATTGAAGT  | GTT-ATAGCC  |
| PH5_15_JF966362      | AATTATCATA  | AAATGACTGG  | AGGAATGTAG  | CTTCGATCTC  | GTATTGAAGT  | GTT-ATAGCC  |
| PH5_19_JF966363      | GATTATCATA  | AAATGACTGG  | AGGAATGTAG  | CTTCGATCTC  | GTATTGAAGT  | GTT-ATAGCC  |
| PH5_24_JF966364      | GATTATCATA  | AAATGACTGG  | AGGAATGTAG  | CTTCGATCTC  | GTATTGAAGT  | GTT-ATAGCC  |
| 20INTR gi 61696929   | GGTTATCATA  | AAATGACTGG  | AGGAATGTAG  | CTTCGATCTC  | GTATTGAAGT  | GTTTATAGCC  |
| 14INTR gi 184152616  | GGTGGTCATA  | AAATGACTGG  | GGGAATGTAG  | CTTCGATCTT  | GTATTGAAGT  | GTT-ATAGCC  |
| 11INTR gi 62183614   | GGTGGTCATA  | AAATGACTGG  | AGGAATGTAG  | CTTCGATCTC  | GTATTGAAGT  | GTT-ATAGCC  |
| 13INTR gi 62183610   | GGTGGTCATA  | AAATGACTGG  | AGGAATGTAG  | CTTCGATCTC  | GTATTGAAGT  | GTT-ATAGCC  |
| 21INTR gi 18140768   | GGTGGTCATA  | AAATGACTGG  | AGGAATGTAG  | CTTCGATCTC  | GTATTGAAGT  | GTT-ATAGCC  |
| 22INTR gi 82398570   | GGTGGTCATA  | AAATGACTGG  | AGGAATGTAG  | CTTCGATCTC  | GTATTGAAGT  | GTT-ATAGCC  |
| 3INTR gi 56791312    | GGTGGTCATA  | AAATGACTGG  | GGGAATGTAG  | CTTCGATCTT  | GTATTGAAGT  | GTT-ATAGCC  |
| 5INTR gi 18140788    | GGGTACCATA  | AAATGGCTGG  | AGGAATGTAG  | CTTCGATCTT  | GTATTGAAGT  | GTT-ATAGCC  |
| 19INTR gi 121488330  | GGGCACCATA  | AAATGGCTGG  | AGGAATGTAG  | CTTCGATCTT  | GTATTGAAGT  | GTT-ATAGCC  |
| 1INTR gi 164612220   | GTGCACCATA  | AAATGGCTGG  | AGGAATGTAG  | CTTCGATCTT  | GTATTGAAGT  | GTT-ATAGCC  |
| 2INTR gi 56791310    | GGTGGTCATA  | AAATGACTGG  | GGGAATGTAG  | CTTCGATCTT  | GTATTGAAGT  | GTT-ATAGCC  |
| PH5_30_JF966366      | GGTTATCATA  | AAATGACTGG  | AGGAATGTAG  | CTTCGATCTC  | GTATTGAAGT  | GTT-ATAGCC  |
| Chomutov_27_JF966370 | GGTTGTCATA  | AAATGACTGG  | AGGAATGTAG  | CTTCGATCTC  | GTATTGAAGT  | GTT-ATAGCC  |
| 15INTR gi 184152620  | GGTTGTCATA  | AAATGACTGG  | AGGAATGTAG  | CTTCGATCTC  | GTATTGAAGT  | GTT-ATAGCC  |
| 10INTR gi 184152619  | GGTTATCATA  | AAATGGTCCG  | AGGAATGTAG  | CTTCGATTTTC | G-ATTGAAGT  | GTT-ATAGCC  |
| Chomutov_6_JF966367  | GGTTATCATA  | AAATGGCTGG  | AGGAATGTAG  | CTTCGATTTTC | G-ATTGAAGT  | GTT-ATAGCC  |
| Chomutov_12_JF966368 | GGTTATCATA  | AAATGGCTGG  | AGGAATGTAG  | CTTCGATTTTC | G-ATTGAAGT  | GTT-ATAGCC  |
| 18INTR gi 44889794   | GGTTATCATA  | AAATGGCTGG  | AGGAATGTAG  | CTTCGATCTC  | GTATTGAAGT  | GTT-ATAGCC  |
| 8INTR gi 44889843    | GATCATCATA  | AAATGGTTGG  | AGGAATGTAG  | CTTCGATCTC  | GTATTGAAGT  | GTT-ATAGCC  |
| 24CLA gi 6966953     | GAACGCATA   | AAAAGCTGG   | AGGGATGTGG  | CTCC---TTC  | G----GGAGT  | GTT-ATAACC  |
| 4ETUN gi 44889774    | GATCGTCATA  | AAAAGCTGG   | AGGGATGTGG  | CTCC---TTC  | G----GGAGT  | GTT-ATAACC  |
| 13MOS gi 49246000    | GAATGTCATA  | AAATGACTGG  | AGGAATGTAG  | CTTCGATCTC  | GTATTGAAGT  | GTT-ATAGCC  |
| 12GEO gi 197215938   | GAATGTCATA  | AAATGACTGG  | AGGAATGTGG  | CTTCGATCTC  | GTATCGAAGT  | GTT-ATAACC  |
| 6MOS gi 49246116     | AATCATTATA  | AAATGGTTGA  | AGGAATGTAA  | CTTTGATTTTC | G-ATCGAGGT  | ATT-ATAGCC  |

**FIG. S2**

|                      | ..... ..... | ..... ..... | ..... ..... | ..... ..... | ..... ..... | ..... ..... |
|----------------------|-------------|-------------|-------------|-------------|-------------|-------------|
|                      | 305         | 315         | 325         | 335         | 345         | 355         |
| Chomutov_15_JF966369 | TTTGGCAGA-  | TGTGATGATC  | GGGATTGAGG  | ATTGCAACGG  | ATACCCTTCG  | GGGCTACTTG  |
| 25INTR gi 6169692    | TTCGGTAGA-  | TGTGATGAAC  | GAGATTGAGG  | ATTGCAACGG  | ATACCCTTCG  | GGGCTACCTG  |
| 23INTR gi 14669703   | TTCGGTAGA-  | TGTGATGAAC  | GAGATTGAGG  | ATTGCAACGG  | ATACCCTTCG  | GGGCTACCTG  |
| 24INTR gi 61696928   | TTCGGTAGA-  | TGTGATGAAC  | GAGATTGAGG  | ATTGCAACGG  | ATACCCTTCG  | GGGCTACCTG  |
| 28INTR gi 61696924   | TTCGGTAGA-  | TGTGATGAAC  | GAGATTGAGG  | ATTGCAACGG  | ATACCCTTCG  | GGGCTACCTG  |
| 27INTR gi 159139348  | TTCGGTAGA-  | TGTGATGATC  | GAGATTGAGG  | ATTGCAACGG  | ATACCCTTCG  | GGGCTACCTG  |
| 26INTR gi 159139353  | TTCGGTAGA-  | TGTGATGATC  | GAGATTGAGG  | ATTGCAACGG  | ATACCCTTCG  | GGGCTACCTG  |
| PH5_7_JF966365       | TTCGGTAGA-  | TGTGATGATC  | GAGATTGAGG  | ATTGCAACGG  | ATACCCTTCG  | GGGCTACCTG  |
| PH5_15_JF966362      | TTTGGTAGA-  | TGTGATGATC  | GAGATTGAGG  | ATTGCAACGG  | ATACCCTTCG  | GGGCTACCTG  |
| PH5_19_JF966363      | TTTGGTAGA-  | TGTGATGATC  | GAGATTGAGG  | ATTGCAACGG  | ATACCCTTCG  | GGGCTACCTG  |
| PH5_24_JF966364      | TTCGGTAGA-  | TGTGATGATC  | GAGATTGAGG  | ATTGCAACGG  | ATACCCTTCG  | GGGCTACCTG  |
| 20INTR gi 61696929   | TTCGGTAGA-  | TGTGATGAAC  | GAGATTGAGG  | ATTGCAACGG  | ATACCCTTCG  | GGGCTACCTG  |
| 14INTR gi 184152616  | TTCGGTAGA-  | TGTGATGATC  | GAGATTGAGG  | ATTGCAACGG  | ATACCCTTTG  | GGGCTACCTG  |
| 11INTR gi 62183614   | TTCGGTAGA-  | TGTGATGATC  | GAGATTGAGG  | ATTGCAACGG  | ATACCCTTTG  | GGGCTACCTG  |
| 13INTR gi 62183610   | TTCGGTAGA-  | TGTGATGATC  | GAGATTGAGG  | ATTGCAACGG  | ATACCCTTCG  | GGGCTACCTG  |
| 21INTR gi 18140768   | TTCGGTAGA-  | TGTGATGATC  | GAGATTGAGG  | ATTGCAACGG  | ATACCCTTCG  | GGGCTACCTG  |
| 22INTR gi 82398570   | TTCGGTAGA-  | TGTGATGATC  | GAGATTGAGG  | ATTGCAACGG  | ATACCCTTCG  | GGGCTACCTG  |
| 3INTR gi 56791312    | TTCGGTAGA-  | TGTGATGATC  | GAGATTGAGG  | ATTGCAACGG  | ATACCCTTCG  | GGGCTACCTG  |
| 5INTR gi 18140788    | TTCGGTAGA-  | TGTGGTGATC  | GAGATTGAGG  | ATTGCAACGG  | ATACCCTTCG  | GGGCTACCTG  |
| 19INTR gi 121488330  | TTCGGTAGA-  | TGTGGTGATC  | GAGATTGAGG  | ATTGCAACGG  | ATACCCTTCG  | GGGCTACCTG  |
| 1INTR gi 164612220   | TTCGGTAGA-  | TGTGGTGATC  | GAGATTGAGG  | ATTGCAACGG  | ATACCCTTCG  | GGGCTACCAG  |
| 2INTR gi 56791310    | TTCGGTAGA-  | TGTGATGATC  | GAGATTGAGG  | ATTGCAACGG  | ATACCCTTCG  | GGGCTACCTG  |
| PH5_30_JF966366      | TTCGGTAGA-  | TGTGATGATC  | GAGATTGAGG  | ATTGCAACGG  | ATACCCTTCG  | GGGCTACCTG  |
| Chomutov_27_JF966370 | TTCGGTAGA-  | TGTGATTATC  | GGGATTGAGG  | ATCGCAACGG  | ATACCCTTCG  | GGGCTACTTG  |
| 15INTR gi 184152620  | TTTGGTAGA-  | TGTGATTATC  | GGGATTGAGG  | ATTGCAACGG  | ATACCCTTCG  | GGGCTACTTG  |
| 10INTR gi 184152619  | TTCGGCAGA-  | TGTGATGATC  | GGGATTGAGG  | ATTGCAACGG  | ATACCCTTCG  | GGGCTACCTG  |
| Chomutov_6_JF966367  | TTCGGCAGA-  | TGTGATGATC  | GGGATTGAGG  | ATTGCAACGG  | ATACCCTTCG  | GGGCTACCTG  |
| Chomutov_12_JF966368 | TTCGGCAGA-  | TGTGATGATC  | GGGATTGAGG  | ATTGCAACGG  | ATACCCTTCG  | GGGCTACCTG  |
| 18INTR gi 44889794   | TTCGGCAGA-  | TGTGATGATT  | GGGATTGAGG  | ATTGCAACGG  | ATACCCTTCG  | GGGCTACCTG  |
| 8INTR gi 44889843    | TTTAGCAGA-  | TGTGATGATT  | GGGATTGAGG  | ATTGCAACGG  | ATACCCTTCG  | GGGCTACCCG  |
| 24CLA gi 6966953     | TTTAGCGGAA  | TGTGGTGGTC  | GGGATTGAGG  | ATTGCAACGA  | ATACC-TTTA  | GGGCTGTTCC  |
| 4ETUN gi 44889774    | TTTAGCGGAA  | TGTGGTGGTC  | GGGATTGAGG  | ATTGCAACGA  | ATACC-TTCA  | GGGCTGTTCC  |
| 13MOS gi 49246000    | TTTGGTAGA-  | TGTGATGTTT  | GAGACCGAGG  | ATTGCAACGG  | ATACCCTTCA  | GGGCTATTCC  |
| 12GEO gi 197215938   | TTTGGTAGA-  | TGTGATGTTT  | GAGACCGAGG  | ATTGCAACGG  | ATACCCTTCC- | AGGCTATTCC  |
| 6MOS gi 49246116     | TTTGACAGA-  | TGTAATGATC  | AAGACCGAGG  | ATTGCAACGG  | ATACCCTTCA  | GGGCTATTCC  |



**FIG. S2**

|                      | ..... ..... | ..... ..... | ..... ..... | ..... ..... | ..... ..... | ..... ..... |
|----------------------|-------------|-------------|-------------|-------------|-------------|-------------|
|                      | 365         | 375         | 385         | 395         | 405         | 415         |
| Chomutov_15_JF966369 | TC-TGATCTC  | TGAT-CGTTG  | CTCTGGTGCC  | GAAAGCTTGC  | TTACGGTTAT  | CAAAGTCGA-  |
| 25INTR gi 6169692    | TC-TGGTCTC  | TGAT-CGTTG  | CTCTGGTGCC  | GAAAGCTTGC  | TTACGGTCAT  | CAAAGTCGA-  |
| 23INTR gi 14669703   | TC-TGGTCTC  | TGAT-CGTTG  | CTCTGGTGCC  | GAAAGCTTGC  | TTACGGTCAT  | CAAAGTCGA-  |
| 24INTR gi 61696928   | TC-TGGTCTC  | TGAT-CGTTG  | CTCTGGTGCC  | GAAAGCTTGC  | TTACGGTCAT  | CAAAGTCGA-  |
| 28INTR gi 61696924   | TC-TGGTCTC  | TGAT-TGTTG  | CTCTGGTGCC  | GAAAGCTTGC  | TTACGGTTAT  | CAAAGTCGA-  |
| 27INTR gi 159139348  | TC-TGGTCTC  | TGAT-CGTTG  | CTCTGGTGCC  | GAAAGCTTGC  | TTACGGTTAT  | CAAAGTCGA-  |
| 26INTR gi 159139353  | TC-TGGTCTC  | TGAT-CGTTG  | CTCTGGTGCC  | GAAAGCTTGC  | TTACGGTTAT  | CAAAGTCAA-  |
| PH5_7_JF966365       | TC-TGGTCTC  | TGAT-CGTTG  | CTCTGGTGCC  | GAAAGCGTGC  | TTACGGTTAT  | CAAAGTCGA-  |
| PH5_15_JF966362      | TC-TGGTCTC  | TGAT-CGTTG  | CTCTGGTGCC  | GAAAGCTTGC  | TTACGGTTAT  | CAAAGTCGA-  |
| PH5_19_JF966363      | CC-TGGTCTC  | TGAT-CGTTG  | CTCTGGTGCC  | GAAAGCGTGC  | TTACGGTTAT  | CAAAGTCGA-  |
| PH5_24_JF966364      | TC-TGGTCTC  | TGAT-CGTTG  | CTCTGGTGCC  | GAAAGCGTGC  | TTACGGTTAT  | CAAAGTCGA-  |
| 20INTR gi 61696929   | TC-TGGTCTC  | TGAT-CGTTG  | CTCTGGTGCT  | GAAAGCTTGC  | TTACAGTTAT  | CAAAGTTGA-  |
| 14INTR gi 184152616  | TC-TGATCTC  | TGAT-CGTTG  | CTTTGGTGCC  | GAAAGCTTGC  | TTACGGTTAT  | CAAAGTCGA-  |
| 11INTR gi 62183614   | TC-TGATCTC  | TGAT-CGTTG  | CTTTGGTGCC  | GAAAGCTTGC  | TTACGGTTAT  | CAAAGTCGA-  |
| 13INTR gi 62183610   | TC-TGATCTC  | TGAT-CGTTG  | TTCTGGTGCC  | GAAAGCTTGC  | TTACGGTTAT  | CAAGGTCGA-  |
| 21INTR gi 18140768   | TC-TGATCTC  | TGAT-CGTTG  | CTCTGGTGCC  | GAAAGCTTGC  | TTACGGTTAT  | CAAAGTCGA-  |
| 22INTR gi 82398570   | TC-TGATCTC  | TGAT-CGTTG  | CTCTGGTGCC  | GAAAGCTTGC  | TTACGGTTAT  | CAAAGTCGA-  |
| 3INTR gi 56791312    | TC-TGGTCTC  | TGAT-CGTTG  | CTCTGGTGCC  | GAAAGCTTGC  | TTACGGTTAT  | CAAAGTCGA-  |
| 5INTR gi 18140788    | TC-TGATCTC  | TGAT-CGTTG  | CTCTGGTGCC  | GAAAGCTTGC? | ??????????  | ??????????  |
| 19INTR gi 121488330  | TC-TGATCTC  | TGAT-CGTTG  | CTTTGGTGCT  | GAAAGCGTGC  | TTATAGTTAT  | CAAAGTCGA-  |
| 1INTR gi 164612220   | TC-TGATCTC  | TGAT-CGTTG  | CTTTGGTGCT  | GAAAGCGTGC  | TTATAGTTAT  | CAAAGTCGA-  |
| 2INTR gi 56791310    | TC-TGGTCTC  | TGAT-CGTTG  | CTCTGGTGCC  | GAAAGCTTGC  | TTACAGTTAT  | CAAAGTCGA-  |
| PH5_30_JF966366      | TC-TGGTCTC  | TGAT-CGTTG  | CTCTGGTGCC  | GAAAGCTTGC  | TTACGGTTAT  | CAAAGTCGA-  |
| Chomutov_27_JF966370 | TC-TGATCTC  | TGAT-CGTTG  | CTCTGGTGCC  | GAAAGCGTGC  | TTACGGTTAT  | CAAAGTCGA-  |
| 15INTR gi 184152620  | TC-TGATCTC  | TGAT-CGTTG  | CTCTGGTGCC  | GAAAGCGTGC  | TTACGGTTAT  | CAAAGTCGA-  |
| 10INTR gi 184152619  | TC-TGGTCTC  | TGAT-CGTTG  | CTCTGGTGCC  | GAAAGCGTGC  | TTACGGTTAT  | CAAAGTCGA-  |
| Chomutov_6_JF966367  | TC-TGGTCTC  | TGAT-CGTTG  | CTCTGGTGCC  | GAAAGCGTGC  | TTACGGTTAT  | CAAAGTCGA-  |
| Chomutov_12_JF966368 | TC-TGGTCTC  | TGAT-CGTTG  | CTCTGGTGCC  | GAAAGCGTGC  | TTACGGTTAT  | CAAAGTCGA-  |
| 18INTR gi 44889794   | TC-TGGTCTC  | TGAT-CGTTG  | CTTTGGTGCC  | GAAAGCGTGC  | TTACGGTTAT  | CAAAGTCGA-  |
| 8INTR gi 44889843    | TC-TGATCTC  | TGAA-AGTTA  | CTCTGGTGCC  | GAAAGCTTGC  | TTACGGT-AT  | CAAAGTTAA-  |
| 24CLA gi 6966953     | ACCTGGCTTC  | TCTT-TGGCA  | TCCTGGTGAC  | GACAGCTTGC  | TGAC-GTTGT  | TAGGAATC-G  |
| 4ETUN gi 44889774    | ACCTGGCTTC  | TCAT-TGGTA  | TCCTGGTGAC  | GACAGCTTGC  | TGAC-TTTGC  | TAGGATTC-G  |
| 13MOS gi 49246000    | TC-TGATCTC  | TGATACGTTG  | CCTTGATGTT  | GAAAGCTTGC  | TTATGAT-GT  | TAGGGTATTA  |
| 12GEO gi 197215938   | TC-TGATCTC  | TGATACGTTG  | CCTTGATGTC  | GAAAGCGTGC  | TTATGAT-GT  | TAGGGTATTA  |
| 6MOS gi 49246116     | TC-TGATCTT  | TGGTACTTGT  | CTTTAGTATC  | GGAAGCTTGC  | TAACGAT-AT  | TAGGGTTC-A  |

FIG. S2

|                      | ..... ..... | ..... ..... | ..... ....  |
|----------------------|-------------|-------------|-------------|
|                      | 425         | 435         | 445         |
| Chomutov_15_JF966369 | -TGGTCAACA  | GGTTAGAACG  | -GGTTAAA    |
| 25INTR gi 6169692    | -TGGTCAATA  | GGTTAGAACG  | -GGTTAAA    |
| 23INTR gi 14669703   | -TGGTCAATA  | GGTTAGAACG  | -GGTTAAA    |
| 24INTR gi 61696928   | -TGGTCAATA  | GGTTAGAACG  | -GGTTAAA    |
| 28INTR gi 61696924   | -TGGTCAATA  | GGTTAGAACG  | -GGTTAAA    |
| 27INTR gi 159139348  | -TGGTCAATA  | GGTTAGAACG  | -GGTTAAA    |
| 26INTR gi 159139353  | -TGGTCAATA  | GGTTANAACG  | -GGTTAAA    |
| PH5_7_JF966365       | -TGGTCAATA  | GGTTAGAACG  | -GGTTAAA    |
| PH5_15_JF966362      | -TGGTCAATA  | GGTTAGAACG  | -GGTT???    |
| PH5_19_JF966363      | -TGGTCAATA  | GGTTAGAACG  | -GGTTAAA    |
| PH5_24_JF966364      | -TGGTCAATA  | GGTTAGAACG  | -GGTTAAA    |
| 20INTR gi 61696929   | -TGGTCAATA  | GGTTAGAACG  | -GGTTAAA    |
| 14INTR gi 184152616  | -TGGT?????  | ??????????? | ??????????? |
| 11INTR gi 62183614   | -TGGTCAATA  | GGTTAGAATG  | -GGTTAAA    |
| 13INTR gi 62183610   | -TGGTCAATA  | GGTTAGAACG  | -GGTTAAA    |
| 21INTR gi 18140768   | -TGGTCAATA  | GGTTAGAACG  | -GGTTAAA    |
| 22INTR gi 82398570   | -TGGTCAATA  | GGTTAGAACG  | -GGTTAAA    |
| 3INTR gi 56791312    | -TGGTCAATA  | GGTTAGAACG  | -GGTTAAA    |
| 5INTR gi 18140788    | ??????????? | ??????????? | ??????????? |
| 19INTR gi 121488330  | -TGGTTAATA  | GGTTAGAATG  | -GGTTAAA    |
| 1INTR gi 164612220   | -TGGTTAATA  | GGTTAGAATG  | -GGTTAAA    |
| 2INTR gi 56791310    | -TGGTCAATA  | GGTTAGAACG  | -GGTTAAA    |
| PH5_30_JF966366      | -TGGTCAATA  | GGTTAGAACG  | -GGTTAAA    |
| Chomutov_27_JF966370 | -TGGTCAATA  | GGTTAGAACG  | -GGTTAAA    |
| 15INTR gi 184152620  | -TGGT?????  | ??????????? | ??????????? |
| 10INTR gi 184152619  | -TGGT?????  | ??????????? | ??????????? |
| Chomutov_6_JF966367  | -TGGTCAATA  | GGTTAGAACG  | -GGTTAAA    |
| Chomutov_12_JF966368 | -TGGTCAATA  | GGTTAGAACG  | -GGTTAAA    |
| 18INTR gi 44889794   | -TGGTCAATA  | GGTTAGAACG  | -GGTTAAA    |
| 8INTR gi 44889843    | -CGTTCAACA  | GGTTAGAACG  | -GGTTAAA    |
| 24CLA gi 6966953     | CCTTTGAACA  | GGCTAGAGTG  | TGA-GCAA    |
| 4ETUN gi 44889774    | CCTCTGAACA  | GGCTAGAGTG  | TGA-GCAA    |
| 13MOS gi 49246000    | C-GGTCAAAA  | GGTTAGAACG  | -AATTACA    |
| 12GEO gi 197215938   | C-GGTCAAAA  | GGTTAGAACG  | -GATTAAA    |
| 6MOS gi 49246116     | CGGGTC-AAA  | GGTTGGAACG  | -GATTAAA    |

FIG. S3

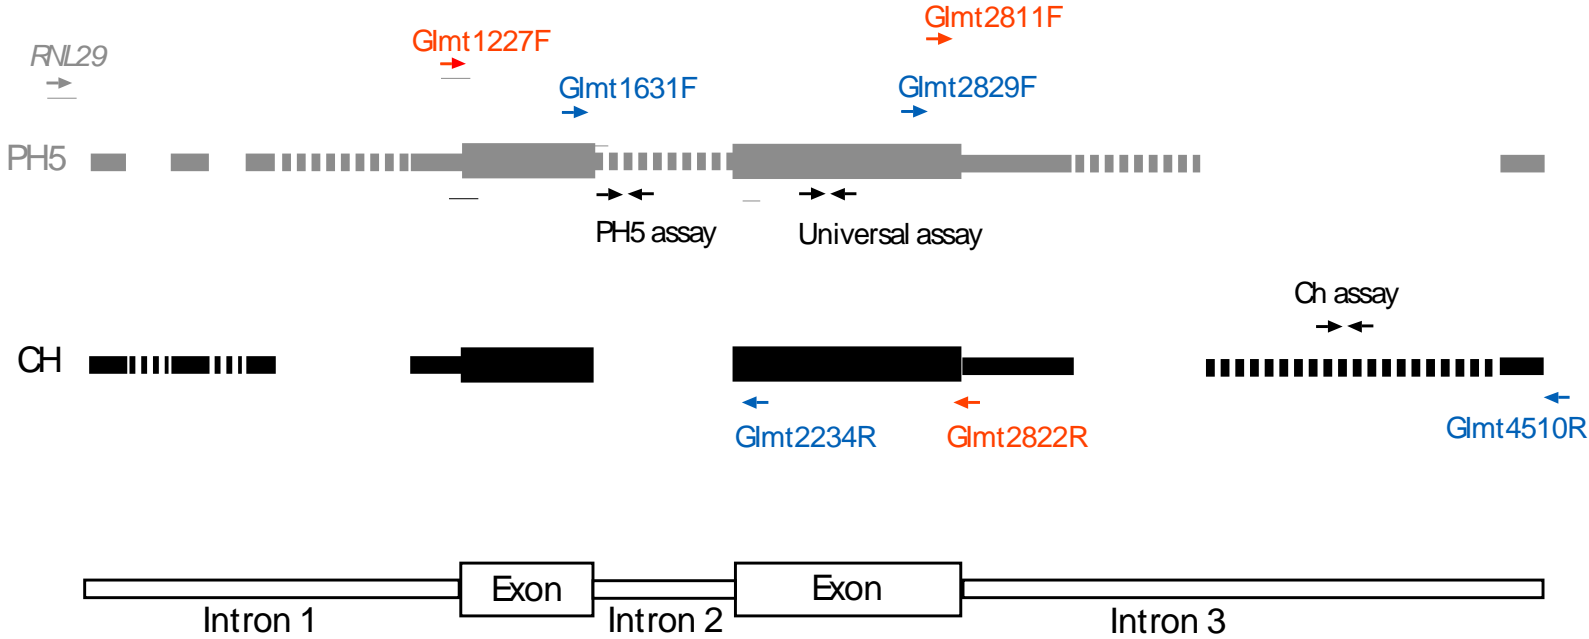

Supplement: supp_78.10.3630_AEM00035-12_supplemental_figures.pdf [file supp_78.10.3630_AEM00035-12_supplemental_figures.pdf]
