# Supplementary material
Source: PubMed Central journal article supplement (PMC3346362)
Supplement: supp_78.10.3630_AEM00035-12_supplemental_tables.pdf [file supp_78.10.3630_AEM00035-12_supplemental_tables.pdf]

**TABLE S1.** PCR primers and conditions used for the characterization of the haplotypes of *Glomus intraradices* s. l. in the large subunit of mitochondrial ribosomal DNA.

| Primer name(s)        | Primer sequences (5'→3')                               | Application                                            | Primer concn<br>( $\mu$ M) | Annealing<br>temp ( $^{\circ}$ C) | MgCl <sub>2</sub> concn<br>(mM) |
|-----------------------|--------------------------------------------------------|--------------------------------------------------------|----------------------------|-----------------------------------|---------------------------------|
| RNL5 / RNL28a         | Börstler <i>et al.</i> , 2008                          | 1 <sup>st</sup> step of nested PCR                     | 0.2 / 0.2                  | 59                                | 1.5                             |
| RNL29 / GImt4510R     | Börstler <i>et al.</i> , 2008 /<br>CATCCACGCTAGTGTTAGC | 2 <sup>nd</sup> step of nested PCR                     | 0.1 / 0.1                  | 53                                | 2                               |
| GImt1631F / GImt2234R | AACACAAGGCAGTCCTCTCC /<br>CCCTCACCAGGCAATATACC         | 2 <sup>nd</sup> step of nested PCR,<br>isolate PH5     | 0.2 / 0.2                  | 59                                | 2.5                             |
| GImt2829F / GImt4510R | GAAGGAACTCGGCAAAATGAC /<br>see above                   | 2 <sup>nd</sup> step of semi-nested<br>PCR, isolate CH | 0.2 / 0.2                  | 56                                | 2.5                             |
| GImt1227F             | AGGTCCGTTGCAAGGGACTC                                   | sequencing                                             |                            |                                   |                                 |
| GImt2811F             | GTGCCACTAATAAGTGGCGG                                   | sequencing                                             |                            |                                   |                                 |
| GImt2822R             | CCCTGTTTAGTGCCGCCACTT                                  | sequencing                                             |                            |                                   |                                 |

**Börstler, B., P. A. Raab, O. Thiéry, J. B. Morton, and D. Redecker.** 2008. Genetic diversity of the arbuscular mycorrhizal fungus *Glomus intraradices* as determined by mitochondrial large subunit rRNA gene sequences is considerably higher than previously expected. *New Phytol.* **180**:452-465.

**TABLE S2.** Root and shoot dry weight of medic plants in the experiment when non-inoculated (NM), inoculated with isolate PH5, isolate Chomutov (CH) or both isolates together (MIX).

| Harvest time    | Inoculation | Shoot dry weight (g) | Root dry weight (g) |
|-----------------|-------------|----------------------|---------------------|
| 6 wks           | NM          | 0.47 (0.07)          | 0.20 (0.09)         |
|                 | PH5         | 0.44 (0.09)          | 0.21 (0.04)         |
|                 | CH          | 0.46 (0.07)          | 0.21 (0.05)         |
|                 | MIX         | 0.54 (0.07)          | 0.24 (0.03)         |
| 12 wks          | NM          | 1.19 (0.17)          | 0.92 (0.30)         |
|                 | PH5         | 1.12 (0.08)          | 0.89 (0.21)         |
|                 | CH          | 1.21 (0.13)          | 0.76 (0.19)         |
|                 | MIX         | 1.29 (0.22)          | 0.83 (0.20)         |
| 26 wks          | NM          | 6.82 (0.71)          | 5.41 (1.67)         |
|                 | PH5         | 7.41 (2.06)          | 4.99 (1.80)         |
|                 | CH          | 6.60 (0.48)          | 5.55 (2.69)         |
|                 | MIX         | 7.77 (1.64)          | 5.85 (3.29)         |
| Significance    |             | F-values             |                     |
| Harvest (A)     |             | 647.9 ***            | 127.8 ***           |
| Inoculation (B) |             | 1.5 ns               | 0.2 ns              |
| A x B           |             | 1.2 ns               | 0.2 ns              |

Data are means of 9-10 replicates (SD). Effects of factors according to ANOVA: ns non-significant effect; \*\*\*  $P < 0.001$ .
